# Supplementary material for: Fluid–rock interactions in the shallow Mariana forearc: carbon cycling and redox conditions
Source: Copernicus journal article supplement (doi:10.5194/se-2019-51), 2019-03-22
Supplement: Supplementary file 1 [file se-2019-51-supplement.pdf]

# Supplementary Information to Albers et al.: ‘Fluid–rock interactions in the shallow Mariana forearc: carbon cycling and redox conditions’

## Figures

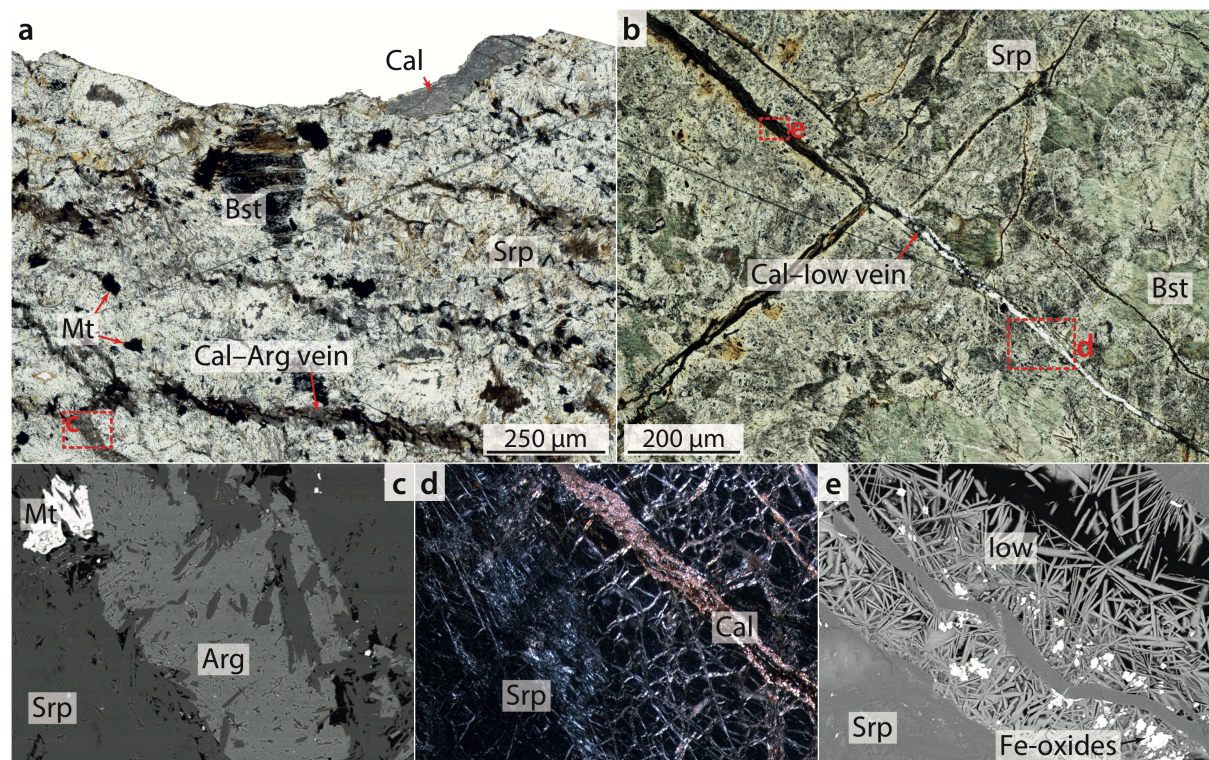

5

Figure S1: Carbonate phases in serpentinite clasts. Thin section scans of (a) a serpentinitized dunite from Asùt Tesoru with calcite and aragonite veins (sample U1495B-5G-CC, 1–3 cm) and (b) a serpentinitized harzburgite from Yinazao crosscut by a narrow calcite–iowaite vein (sample U1492C-1H-2, 18–20cm). Red rectangles mark positions of close-ups shown in lower panels. (c) SEM image of blocky aragonite. (d,e) Photomicrograph of calcite and SEM image of acicular iowaite occurring within the same vein. Abbreviations: Arg, aragonite; Bst, bastite; Cal, calcite; low, iowaite; Mt, magnetite.

10

## Tables

**Table S1: Representative geochemistry of metamorphic phases.**

| Sample                         | U1498B-<br>8R-1,<br>32–34<br>cm | U1495B-<br>5G-CC,<br>1–3 cm | U1497A-<br>12F-1,<br>93–95<br>cm | U1498B-<br>8R-1,<br>32–34<br>cm | U1496B-<br>8X-CC,<br>33–41<br>cm | U1496B-<br>10F-2,<br>10–12<br>cm | U1496B-<br>8X-CC,<br>33–41<br>cm | U1496B-<br>8X-CC,<br>33–41<br>cm | U1498B-<br>8R-1,<br>32–34<br>cm | U1496A-<br>10G-CC,<br>23–26<br>cm | U1497A-<br>12F-1,<br>93–95<br>cm | U1496B-<br>8X-CC,<br>33–41<br>cm | U1498B-<br>8R-1,<br>10–15<br>cm | U1496A-<br>10G-CC,<br>23–26<br>cm | U1498B-<br>8R-1, 0–<br>4 cm | U1498B-<br>8R-1,<br>32–34<br>cm |
|--------------------------------|---------------------------------|-----------------------------|----------------------------------|---------------------------------|----------------------------------|----------------------------------|----------------------------------|----------------------------------|---------------------------------|-----------------------------------|----------------------------------|----------------------------------|---------------------------------|-----------------------------------|-----------------------------|---------------------------------|
| Seamount                       | Fantang-<br>isña                | Asùt<br>Tesoru              | Fantang-<br>isña                 | Fantang-<br>isña                | Asùt<br>Tesoru                   | Asùt<br>Tesoru                   | Asùt<br>Tesoru                   | Asùt<br>Tesoru                   | Fantang-<br>isña                | Asùt<br>Tesoru                    | Fantang-<br>isña                 | Asùt<br>Tesoru                   | Fantang-<br>isña                | Asùt<br>Tesoru                    | Fantang-<br>isña            | Fantang-<br>isña                |
| Phase                          | Chl                             | Chl                         | Cpx                              | Cpx                             | Gln                              | Gln                              | Lws                              | Lws                              | Pct                             | Pct                               | Ph                               | Ph                               | Pmp                             | Pmp                               | Prh                         | Prh                             |
| wt. %                          |                                 |                             |                                  |                                 |                                  |                                  |                                  |                                  |                                 |                                   |                                  |                                  |                                 |                                   |                             |                                 |
| SiO <sub>2</sub>               | 30.68                           | 32.90                       | 46.49                            | 45.83                           | 53.30                            | 52.54                            | 38.10                            | 38.27                            | 53.07                           | 53.36                             | 52.27                            | 54.42                            | 34.10                           | 35.91                             | 42.32                       | 42.61                           |
| TiO <sub>2</sub>               | 0.01                            | 0.04                        | 2.66                             | 1.98                            | 0.08                             | 0.43                             | 0.14                             | 0.20                             | 0.05                            | <0.01                             | 0.53                             | 0.06                             | 0.44                            | 0.15                              | 0.01                        | 0.21                            |
| Al <sub>2</sub> O <sub>3</sub> | 14.88                           | 15.06                       | 6.73                             | 4.91                            | 4.86                             | 4.89                             | 32.14                            | 31.97                            | <0.01                           | 0.06                              | 17.02                            | 20.61                            | 21.51                           | 22.49                             | 24.36                       | 24.49                           |
| Cr <sub>2</sub> O <sub>3</sub> | 0.25                            | 0.62                        | 0.05                             | 0.10                            | 0.02                             | 0.01                             | 0.03                             | 0.03                             | <0.01                           | 0.02                              | <0.01                            | 0.01                             | 0.08                            | 0.05                              | 0.02                        | 0.03                            |
| MgO                            | 19.82                           | 34.23                       | 13.33                            | 9.84                            | 1.41                             | 2.94                             | 0.02                             | 0.03                             | 0.02                            | 0.01                              | 6.25                             | 5.14                             | 2.63                            | 7.49                              | 0.00                        | 0.10                            |
| FeO                            | 19.80                           | 3.62                        | 8.22                             | 16.00                           | 22.58                            | 17.98                            | 1.11                             | 1.54                             | 0.33                            | 0.07                              | 10.07                            | 3.87                             | 6.39                            | 6.30                              | 0.08                        | 0.38                            |
| MnO                            | 0.17                            | <0.01                       | 0.11                             | 0.25                            | 0.15                             | 1.35                             | 0.04                             | 0.01                             | 1.10                            | 0.08                              | 0.11                             | 0.07                             | 0.10                            | 0.03                              | 0.00                        | 0.03                            |
| CaO                            | 0.92                            | 0.06                        | 22.13                            | 19.18                           | 2.91                             | 5.07                             | 16.52                            | 16.61                            | 32.36                           | 33.41                             | 0.69                             | 0.12                             | 20.76                           | 17.39                             | 25.37                       | 26.46                           |
| Na <sub>2</sub> O              | 0.19                            | 0.11                        | 0.50                             | 0.51                            | 10.71                            | 9.53                             | 0.02                             | <0.01                            | 8.23                            | 8.14                              | 0.52                             | 0.19                             | 0.28                            | 0.54                              | 0.08                        | 0.08                            |
| K <sub>2</sub> O               | 0.02                            | 0.02                        | 0.01                             | 0.01                            | 0.06                             | 0.34                             | 0.09                             | 0.14                             | <0.01                           | <0.01                             | 7.54                             | 10.48                            | 0.01                            | 0.10                              | <0.01                       | <0.01                           |
| Total                          | 86.74                           | 86.66                       | 100.22                           | 98.62                           | 96.06                            | 95.08                            | 88.21                            | 88.77                            | 95.14                           | 95.15                             | 94.99                            | 94.96                            | 86.30                           | 90.44                             | 92.24                       | 94.38                           |
| Cations pfu                    |                                 |                             |                                  |                                 |                                  |                                  |                                  |                                  |                                 |                                   |                                  |                                  |                                 |                                   |                             |                                 |
| Si                             | 3.172                           | 3.123                       | 1.744                            | 1.800                           | 8.173                            | 8.065                            | 2.005                            | 2.006                            | 3.006                           | 3.010                             | 3.609                            | 3.665                            | 2.947                           | 2.920                             | 3.002                       | 2.970                           |
| Ti                             | 0.001                           | 0.003                       | 0.075                            | 0.059                           | 0.009                            | 0.049                            | 0.005                            | 0.008                            | 0.002                           | 0.000                             | 0.028                            | 0.003                            | 0.029                           | 0.009                             | 0.001                       | 0.011                           |
| Al                             | 1.813                           | 1.685                       | 0.298                            | 0.227                           | 0.878                            | 0.885                            | 1.993                            | 1.975                            | 0.000                           | 0.004                             | 1.385                            | 1.636                            | 2.191                           | 2.156                             | 2.036                       | 2.012                           |
| Cr                             | 0.021                           | 0.047                       | 0.001                            | 0.003                           | 0.002                            | 0.001                            | 0.001                            | 0.001                            | 0.000                           | 0.001                             | 0.000                            | 0.001                            | 0.005                           | 0.003                             | 0.001                       | 0.002                           |
| Mg                             | 3.055                           | 4.846                       | 0.745                            | 0.576                           | 0.321                            | 0.672                            | 0.001                            | 0.002                            | 0.001                           | 0.001                             | 0.643                            | 0.516                            | 0.339                           | 0.908                             | 0.000                       | 0.010                           |
| Fe                             | 1.712                           | 0.287                       | 0.258                            | 0.526                           | 2.895                            | 2.308                            | 0.049                            | 0.068                            | 0.015                           | 0.003                             | 0.582                            | 0.218                            | 0.462                           | 0.428                             | 0.004                       | 0.022                           |
| Mn                             | 0.015                           | 0.000                       | 0.003                            | 0.008                           | 0.019                            | 0.176                            | 0.002                            | 0.000                            | 0.053                           | 0.004                             | 0.006                            | 0.004                            | 0.007                           | 0.002                             | 0.000                       | 0.002                           |
| Ni                             | 0.000                           | 0.000                       | 0.000                            | 0.000                           | 0.005                            | 0.000                            | 0.000                            | 0.000                            | 0.000                           | 0.000                             | 0.000                            | 0.000                            | 0.000                           | 0.001                             | 0.000                       | 0.000                           |
| Ca                             | 0.102                           | 0.006                       | 0.889                            | 0.807                           | 0.479                            | 0.834                            | 0.932                            | 0.933                            | 1.964                           | 2.019                             | 0.051                            | 0.009                            | 1.922                           | 1.515                             | 1.928                       | 1.976                           |
| Na                             | 0.038                           | 0.020                       | 0.036                            | 0.039                           | 3.184                            | 2.836                            | 0.002                            | 0.000                            | 0.904                           | 0.890                             | 0.069                            | 0.025                            | 0.047                           | 0.085                             | 0.011                       | 0.010                           |
| K                              | 0.003                           | 0.002                       | 0.000                            | 0.001                           | 0.011                            | 0.067                            | 0.006                            | 0.009                            | 0.000                           | 0.000                             | 0.664                            | 0.900                            | 0.001                           | 0.010                             | 0.000                       | 0.000                           |
| Sum                            | 9.931                           | 10.019                      | 4.050                            | 4.046                           | 15.976                           | 15.894                           | 4.997                            | 5.002                            | 5.944                           | 5.933                             | 7.037                            | 6.976                            | 7.950                           | 8.039                             | 6.984                       | 7.017                           |

*Note.* Cations pfu calculated on the basis of 6 O for Cpx, 14 O for Chl, 11 O for Prh, 12 O for Pmp, 11 O for Ph, 8 O for Lws, 23 O for Gln.

Abbreviations: Chl, chlorite; Cpx, clinopyroxene; Gln, glaucophane; Lws, lawsonite; pfu, per formula unit; Ph, phengite; Pmp, pumpellyite; Prh, prehnite.

**Table S2: Pore water Sr concentrations and isotopic compositions.**

| Sample                   | Seamount    | Depth<br>[m bsf] <sup>a</sup> | Sr [nM] | <sup>87</sup> Sr/ <sup>86</sup> Sr |
|--------------------------|-------------|-------------------------------|---------|------------------------------------|
| U1492C-1H-2              | Yinazao     | 0.0                           | 536     | 0.70598                            |
| U1492C-1H-4              | Yinazao     | 0.0                           | 660     | 0.70584                            |
| U1492C-3F-1              | Yinazao     | 7.0                           | 688     | 0.70566                            |
| U1492C-3F-2              | Yinazao     | 7.0                           | 687     | 0.70566                            |
| U1492C-5F-2              | Yinazao     | 14.2                          | 667     | 0.70568                            |
| U1492C-8F-2              | Yinazao     | 28.2                          | 679     | 0.70566                            |
| U1492C-11F-2             | Yinazao     | 37.6                          | 681     | 0.70567                            |
| U1492C-12F-1             | Yinazao     | 42.3                          | 688     | 0.70569                            |
| U1492C-13F-1             | Yinazao     | 47.0                          | 687     | 0.70567                            |
| U1492C-16F-1             | Yinazao     | 61.1                          | 503     | 0.70594                            |
| U1492C-19F-2             | Yinazao     | 75.2                          | 613     | 0.70569                            |
| U1492C-22F-1             | Yinazao     | 89.3                          | 741     | 0.70567                            |
| U1492C-24F-2             | Yinazao     | 98.7                          | 738     | 0.70567                            |
| U1492C-26F-1             | Yinazao     | 108.1                         | 729     | 0.70566                            |
| U1492C-27F-1             | Yinazao     | 112.8                         | 746     | 0.70567                            |
| U1497A-2F-2              | Fantangisña | 0.9                           | 265     | 0.70585                            |
| U1497A-6F-1              | Fantangisña | 16.7                          | 629     | 0.70495                            |
| U1497B-3F-2              | Fantangisña | 8.4                           | 336     | 0.70573                            |
| U1497B-6F-1              | Fantangisña | 17.8                          | 584     | 0.70507                            |
| U1496A-2F-1              | Asùt Tesoru | 3.2                           | 15.4    | 0.70514                            |
| U1496A-3F-4              | Asùt Tesoru | 7.9                           | 20.1    | 0.70515                            |
| U1496A-6F-3              | Asùt Tesoru | 22.0                          | 16.8    | 0.70516                            |
| U1496A-9F-1              | Asùt Tesoru | 36.1                          | 19.9    | 0.70527                            |
| U1496B-2F-1              | Asùt Tesoru | 1.9                           | 9.3     | 0.70588                            |
| U1496B-3F-2              | Asùt Tesoru | 6.6                           | 11      | 0.70526                            |
| U1496B-3F-5              | Asùt Tesoru | 6.6                           | 12.4    | 0.70517                            |
| U1496B-5F-2              | Asùt Tesoru | 16.0                          | 10.4    | 0.70510                            |
| U1496C-12G-3             | Asùt Tesoru | 98.8                          | 21      | 0.70576                            |
| U1496C-13G-3             | Asùt Tesoru | 102.5                         | 21.7    | 0.70549                            |
| U1496C-WSTP <sup>b</sup> | Asùt Tesoru | 42.0                          | 86.5    | 0.70675                            |

*Note.* <sup>a</sup> Given depths are tops of individual cores.

<sup>b</sup> WSTP is water-sampling temperature probe; the sample was collected 9.5 days after circulation of drilling fluids had ceased in the bore hole; see Fryer et al. (2018d).
